# Supplementary material
Source: publisher figshare collection journal article supplement (https://acs.figshare.com/ndownloader/files/14083625)
Supplement: Supplementary file 1 [file 14083625]

# Supporting Information

## Metal-Organic Frameworks as Electrolyte Additives to Enable Ultrastable Plating/Stripping of Li Anode with Dendrite Inhibition

Fulu Chu<sup>†,‡</sup>, Jiulin Hu<sup>†</sup>, Chenglong Wu<sup>†</sup>, Zhenguo Yao<sup>†</sup>, Jing Tian<sup>†</sup>, Zheng Li<sup>\*,‡</sup>, and Chilin Li<sup>\*,†</sup>

<sup>†</sup>State Key Laboratory of High Performance Ceramics and Superfine Microstructure, Shanghai Institute of Ceramics, Chinese Academy of Sciences, 1295 Ding Xi Road, Shanghai 200050, China. Email: [chilinli@mail.sic.ac.cn](mailto:chilinli@mail.sic.ac.cn)

<sup>‡</sup>School of Materials Science and Engineering, Xiangtan University, Xiangtan 411105, China. Email: [lizheng@xtu.edu.cn](mailto:lizheng@xtu.edu.cn)

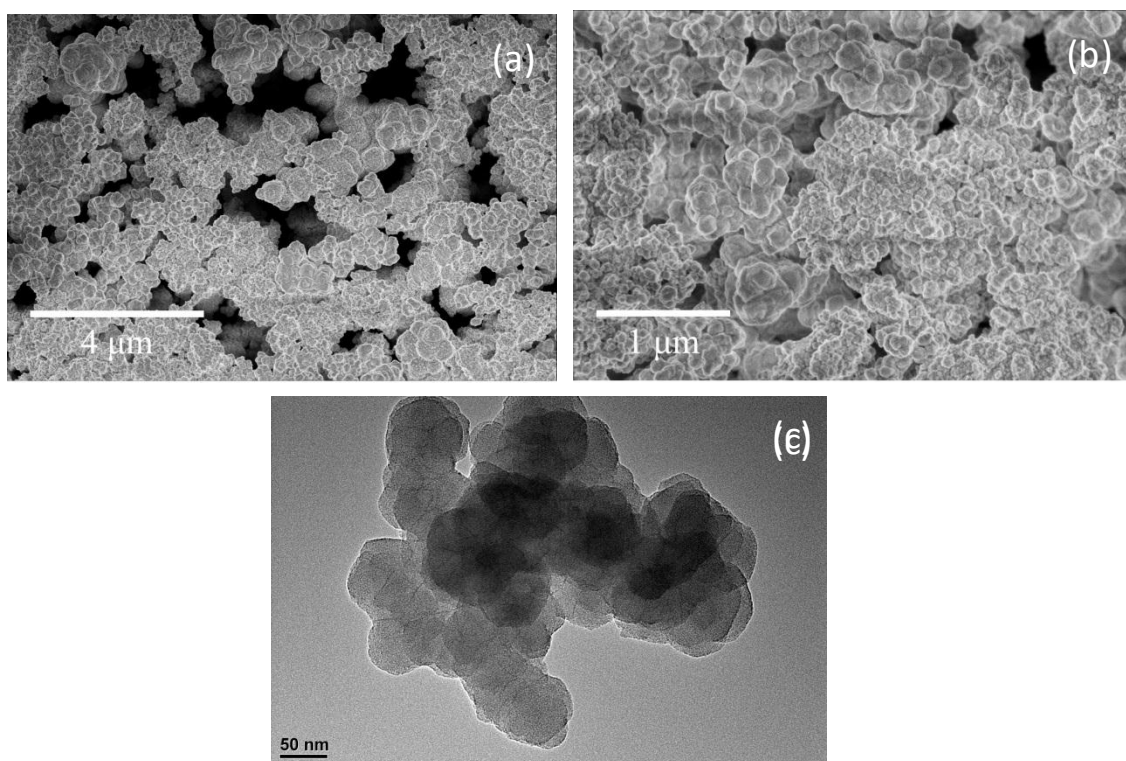

**Figure S1.** (a, b) SEM images of UiO-66 grains with different scale.  
(c) TEM image of UiO-66 grains.

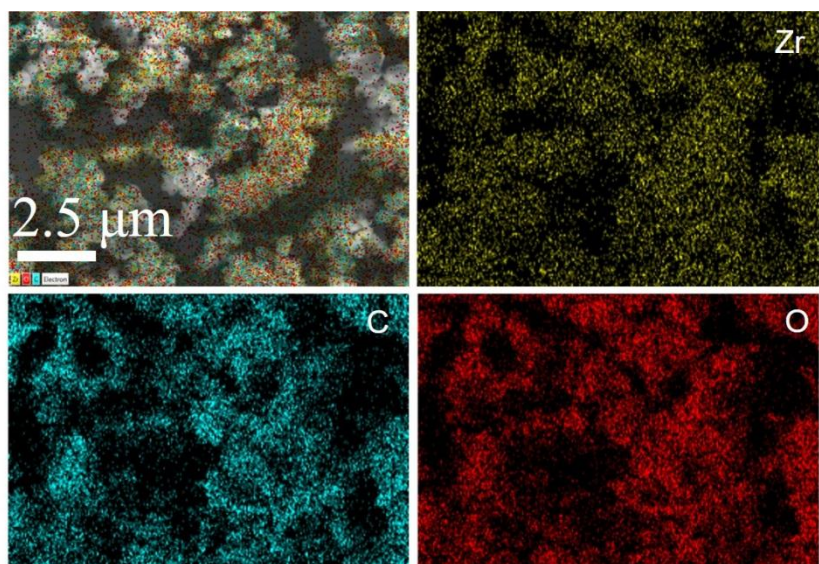

**Figure S2.** EDX element mapping of Zr, C and O in UiO-66.



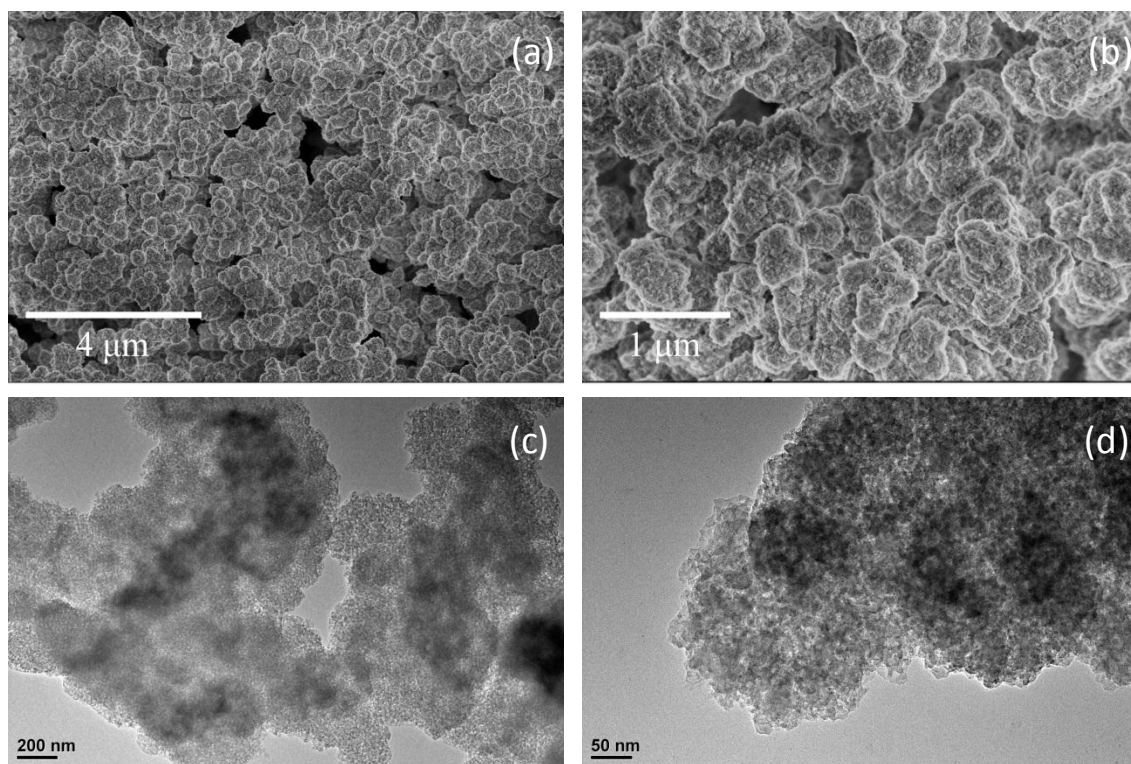

**Figure S3.** (a, b) SEM images of MIL-101-NH<sub>2</sub> grains with different scale. (c, d) TEM image of MIL-101-NH<sub>2</sub> grains with different scale.

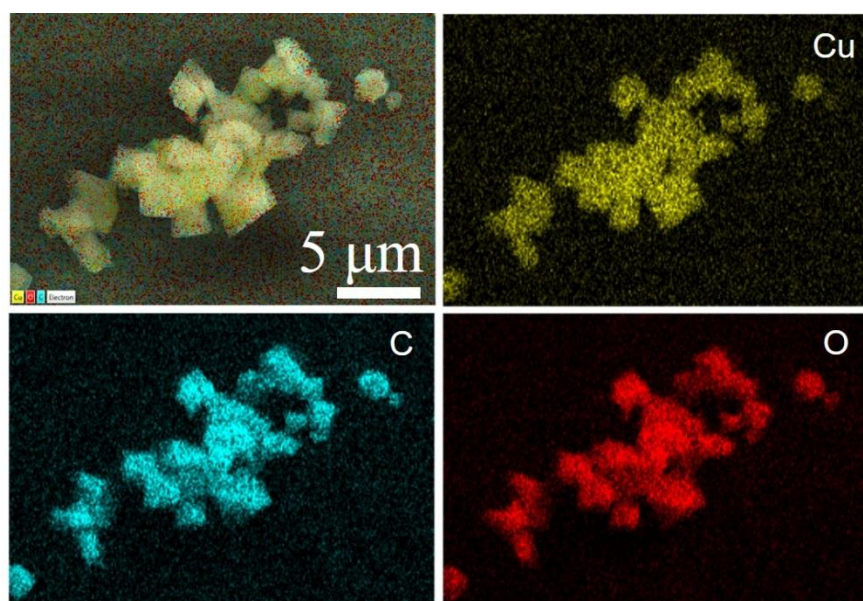

**Figure S4.** EDX element mapping of Cu, C and O in HKUST-1.

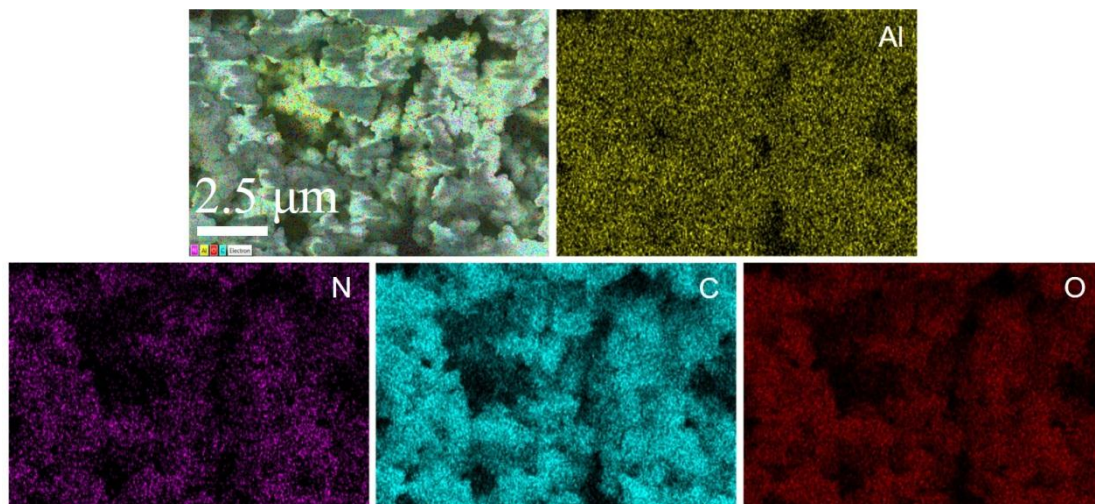

**Figure S5.** EDX element mapping of Al, N, C and O in MIL-101-NH<sub>2</sub>.

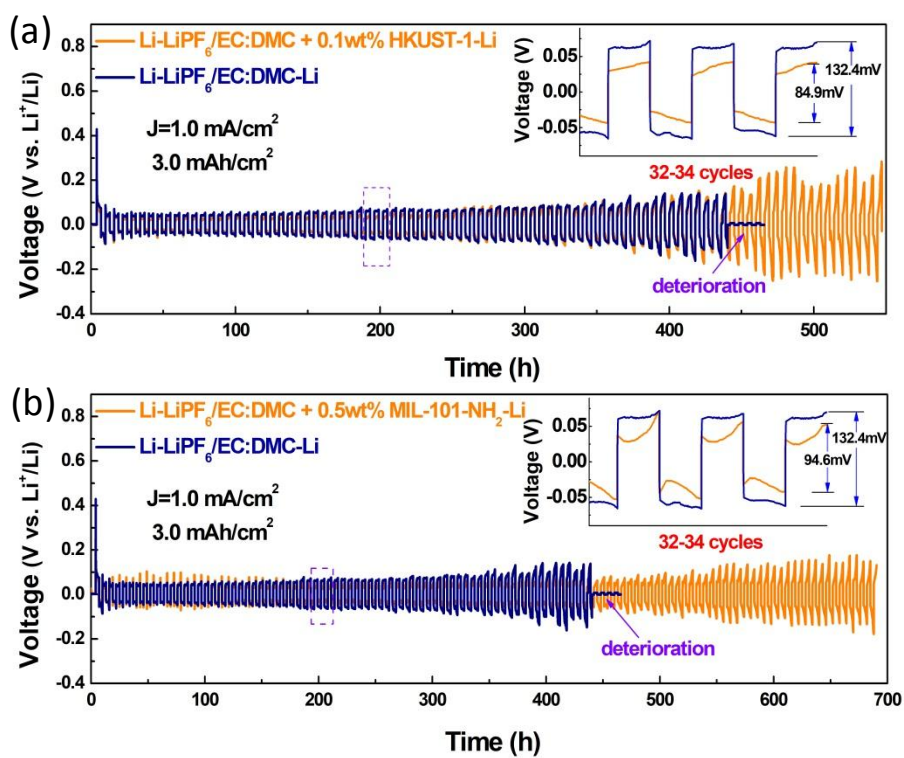

**Figure S6.** Li plating/stripping performance of Li||Li symmetric cells with (a) 0.1wt% HKUST-1 and (b) 0.5wt% MIL-101-NH<sub>2</sub> at 1 mA/cm<sup>2</sup> with an areal capacity of 3 mAh/cm<sup>2</sup>. The performance of Li||Li symmetric cell free of MOF additive is also shown as a reference. Insets: corresponding voltage profiles during 32-34 cycles.

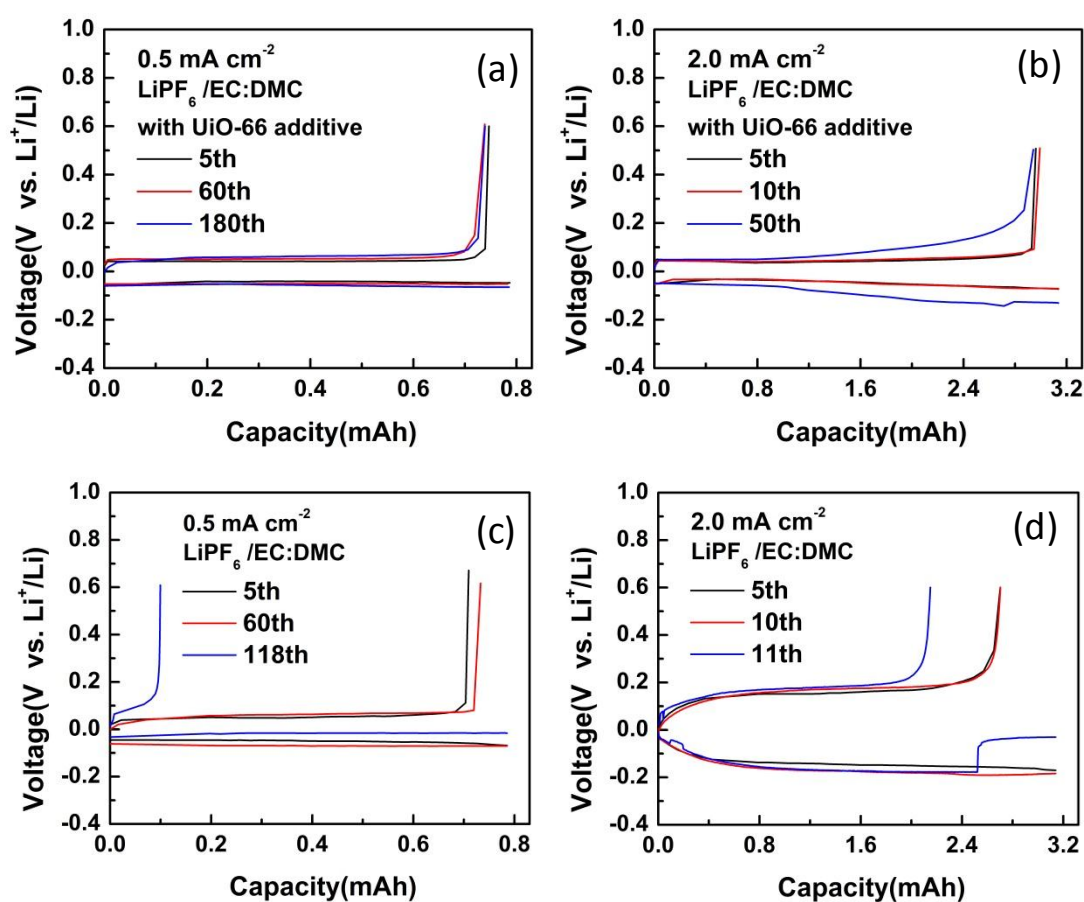

**Figure S7.** Voltage profiles of Li||Cu asymmetric cells with UiO-66 additive at different cycling stages at (a) 0.5 mA/cm<sup>2</sup> and (b) 2 mA/cm<sup>2</sup>. Voltage profiles of Li||Cu asymmetric cells free of MOF additive at different cycling stages at (c) 0.5 mA/cm<sup>2</sup> and (d) 2 mA/cm<sup>2</sup>.



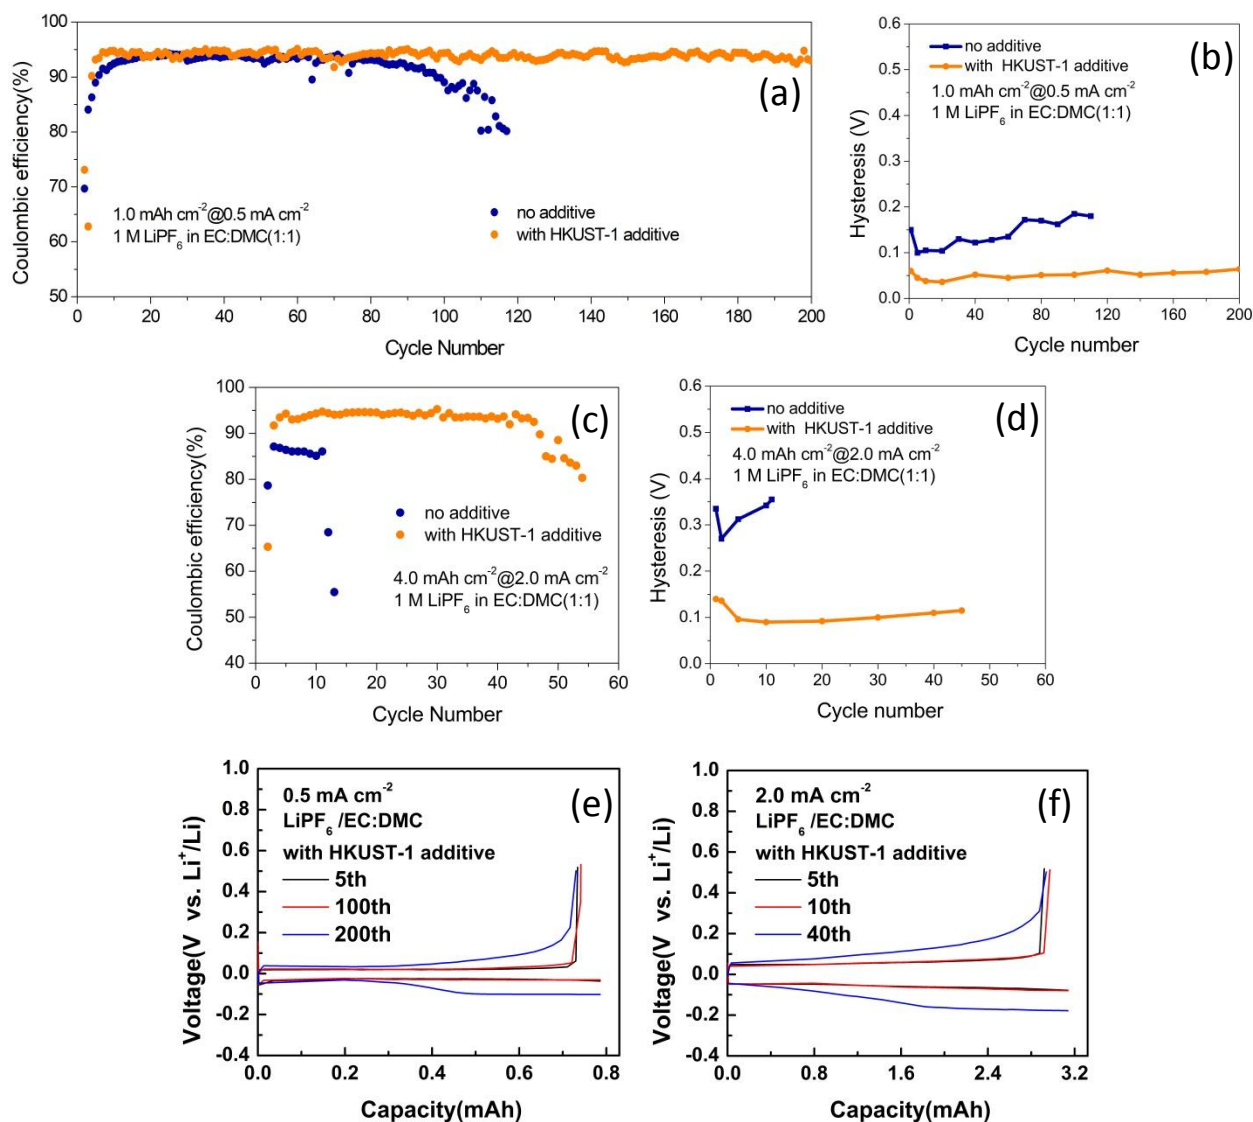

**Figure S8.** Comparison of Coulombic efficiency as a function of cycle number in LiPF<sub>6</sub>-EC-DMC system with 0 and 1.0 wt% HKUST-1 as additive (a) at 0.5 mA/cm<sup>2</sup> with a capacity of 1 mAh/cm<sup>2</sup> and (c) at 2 mA/cm<sup>2</sup> with a capacity of 4 mAh/cm<sup>2</sup>. Corresponding voltage hysteresis as a function of cycle number at (b) 0.5 and (d) 2 mA/cm<sup>2</sup>. Voltage profiles of Li||Cu asymmetric cells with HKUST-1 additive at different

cycling stages at (e)  $0.5 \text{ mA/cm}^2$  and (f)  $2 \text{ mA/cm}^2$ .

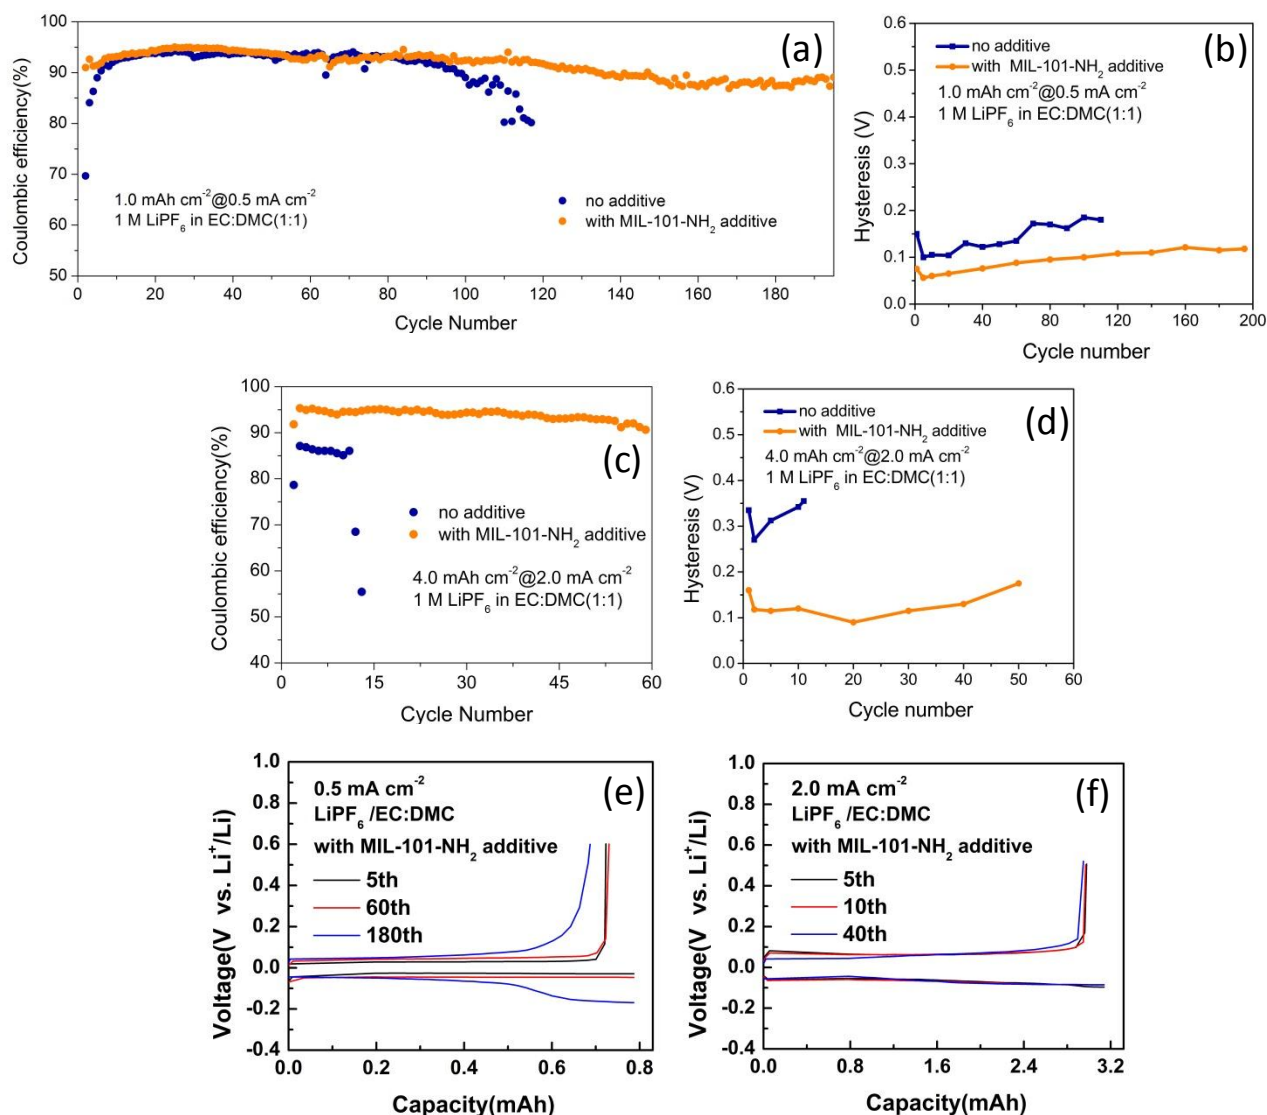

**Figure S9.** Comparison of Coulombic efficiency as a function of cycle number in LiPF<sub>6</sub>-EC-DMC system with 0 and 1.0 wt% MIL-101-NH<sub>2</sub> as additive (a) at  $0.5 \text{ mA/cm}^2$  with a capacity of  $1 \text{ mAh/cm}^2$  and (c) at  $2 \text{ mA/cm}^2$  with a capacity of  $4 \text{ mAh/cm}^2$ . Corresponding voltage hysteresis as a function of cycle number at (b)  $0.5$  and (d)  $2 \text{ mA/cm}^2$ . Voltage profiles of Li||Cu asymmetric cells with MIL-101-NH<sub>2</sub> additive at

different cycling stages at (e) 0.5 mA/cm<sup>2</sup> and (f) 2 mA/cm<sup>2</sup>.

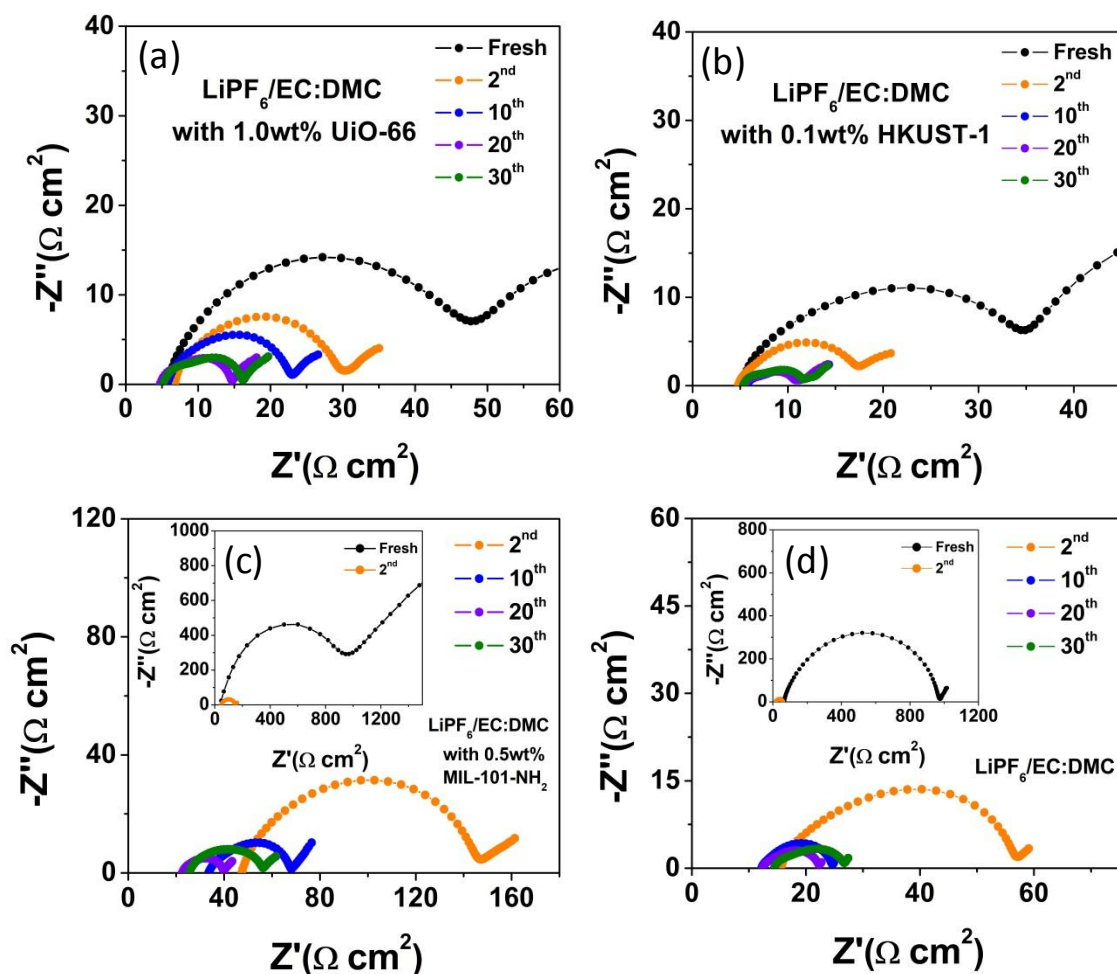

**Figure S10.** Electrochemical impedance spectra of Li||Li symmetric cells at different cycling stages for (a) 1 wt% UiO-66-contained, (b) 0.1 wt% HKUST-1-contained, (c) 0.5 wt% MIL-101-NH<sub>2</sub>-contained and (d) additive-free LiPF<sub>6</sub>-EC-DMC systems at 0.5 mA/cm<sup>2</sup> with an areal capacity of 1.5 mAh/cm<sup>2</sup>. Insets of (c,d): electrochemical impedance spectra of Li||Li symmetric cells before cycling and after 2 cycles for the (c) MIL-101-NH<sub>2</sub>-contained and (d) additive-free systems.



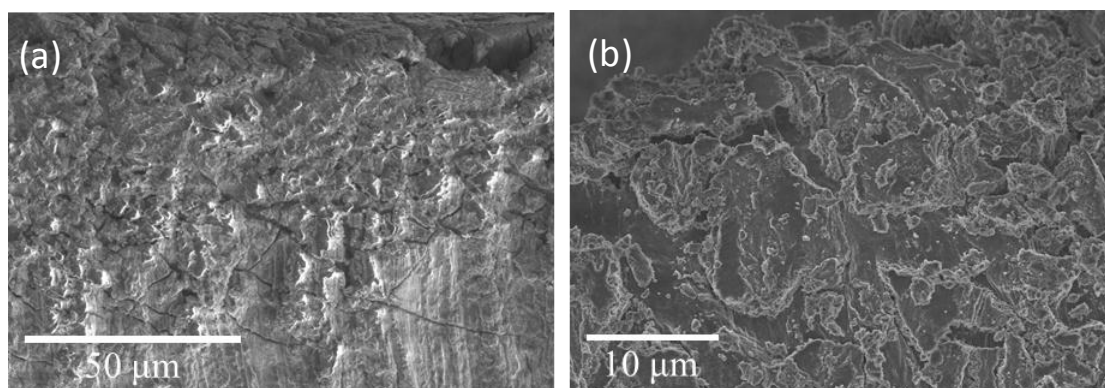

**Figure S11.** Cross-section SEM images of cycled Li morphology at Li plating stage based on Li||Li symmetric cells after 60 cycles for 1wt% UiO-66-contained LiPF<sub>6</sub>-EC-DMC system, focusing on (a) the interface region between plated Li and unreacted Li as well as (b) the near-surface region.

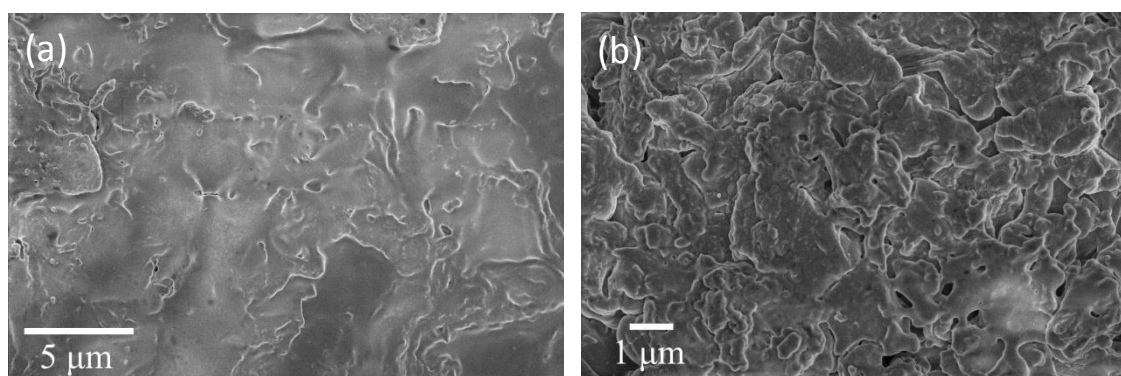

**Figure S12.** (a) Overview and (b) magnified SEM images of cycled Li surface morphology at Li plating stage based on Li||Li symmetric cells with 0.1wt% HKUST-1 after 60 cycles at 1 mA/cm<sup>2</sup> with a capacity of 3 mAh/cm<sup>2</sup>.

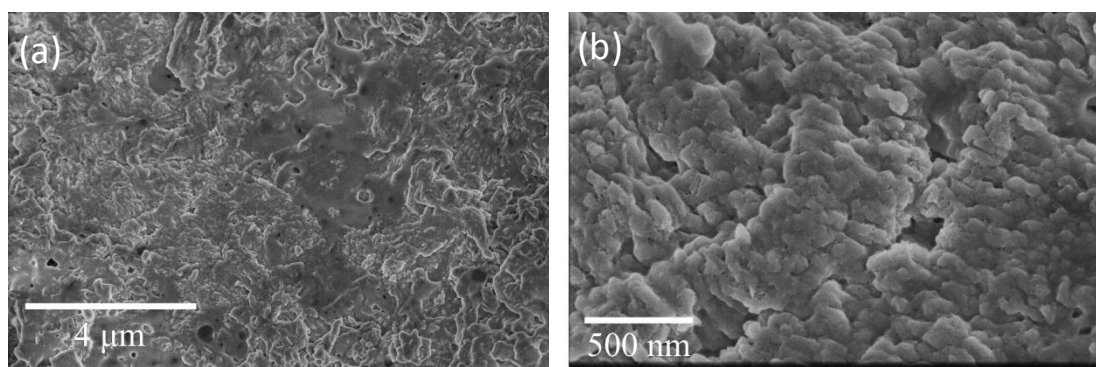

**Figure S13.** (a) Overview and (b) magnified SEM images of cycled Li surface morphology at Li plating stage based on Li||Li symmetric cells with 0.5wt% MIL-101-NH<sub>2</sub> after 60 cycles at 1 mA/cm<sup>2</sup> with a capacity of 3 mAh/cm<sup>2</sup>.

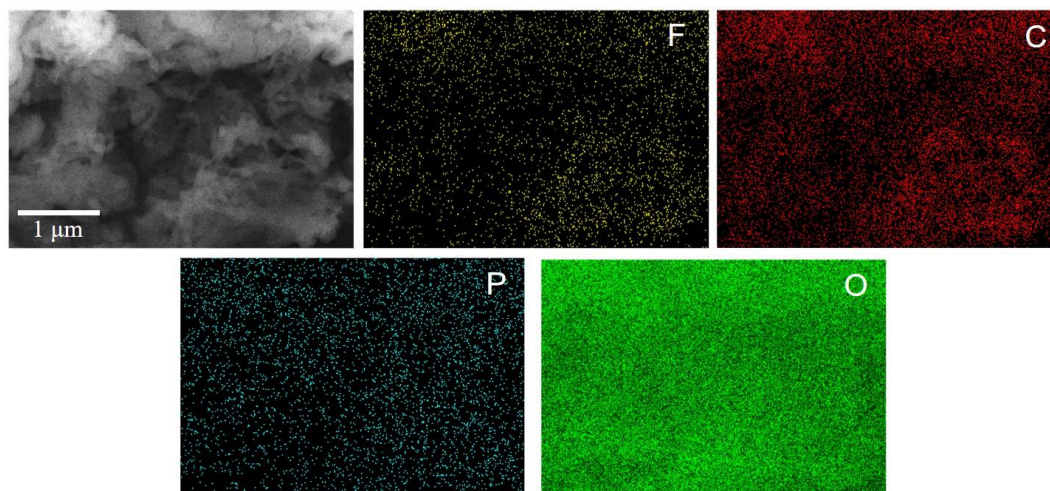

**Figure S14.** EDX mapping images of cycled Li anode at Li plating stage based on Li||Li symmetric cell after 60 cycles for additive-free LiPF<sub>6</sub>-EC-DMC systems.

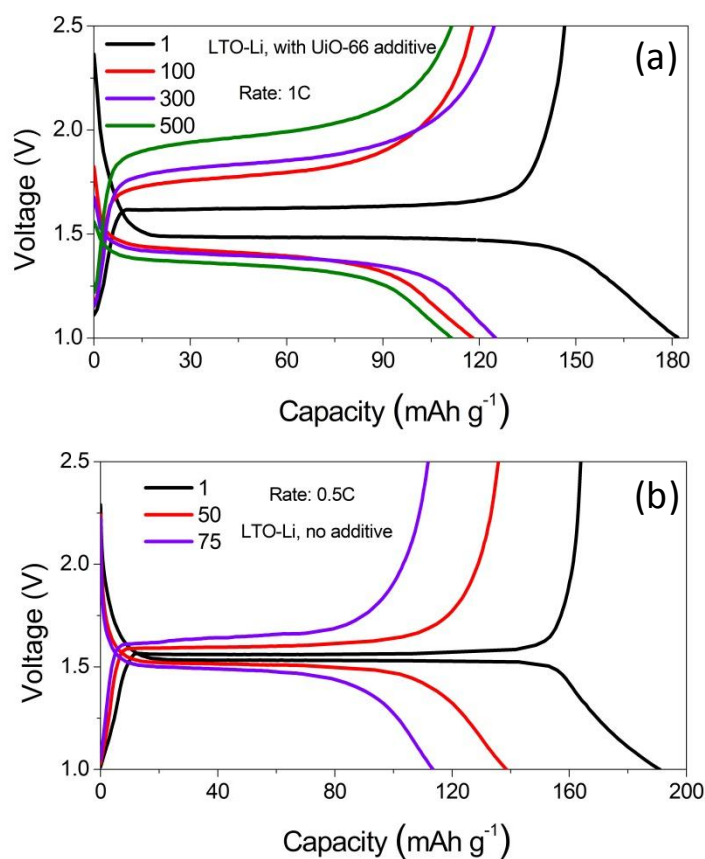

**Figure S15.** Voltage curves of Li/LTO cells (a) with UiO-66 as additive at 1C and (b) without additive at 0.5C at different cycling stages.

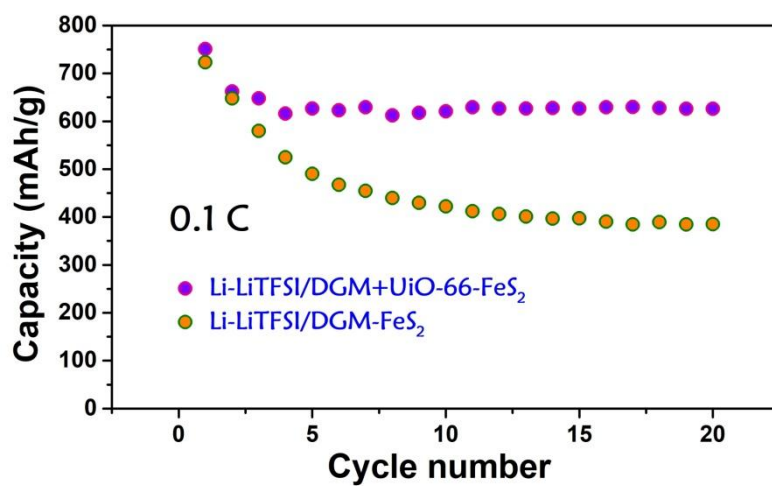

**Figure S16.** Cycling performance comparison of Li/FeS<sub>2</sub> cells with and without UiO-66 as additive at 0.1C.
